# Supplementary material for: Trace SO2 capture within the engineered pore space using a highly stable SnF62−-pillared MOF
Source: Royal Society of Chemistry journal article supplement (doi:10.1039/d3mh02222f), 2024-01-01
Supplement: d3mh02222f1.pdf [file d3mh02222f1.pdf]

1

Supporting Information

2 **Trace SO<sub>2</sub> Capture within the Engineered Pore Space**  
3 **using a Highly Stable SnF<sub>6</sub><sup>2-</sup>-pillared MOF**

4 Weiwei Li,<sup>†</sup> Can Cheng,<sup>†</sup> Guanqun Gao,<sup>†</sup> Haomiao Xu,<sup>†</sup> Wenjun Huang,<sup>†</sup> Zan Qu,<sup>†,\*</sup>  
5 and Naiqiang Yan<sup>†</sup>

6 <sup>†</sup> School of Environmental Science and Engineering, Shanghai Jiao Tong University, 800 Dongchuan  
7 Road, Shanghai 200240, China

8 \**quzan@sjtu.edu.cn*

9

10 **Section S1. Chemicals and materials**  
11 **Section S2. Methodology**  
12 **Section S3. Single-crystal X-ray diffraction**  
13 **Section S4. Density functional theory (DFT) calculations**  
14 **Section S5. Grand Canonical Monte Carlo (GCMC) simulations**  
15 **Section S6. Figures and Tables**  
16 **Scheme S1.** A schematic illustration of breakthrough experiments in the fixed-bed reaction system.  
17 **Scheme S2.** A schematic illustration of adsorption-desorption cycling tests in the in-situ thermal-  
18 gravimetric balance system.  
19 **Figure S1.** (A) Photography of synthesis of single-crystal SNFSIX-Cu-TPA utilizing NMR glass  
20 tubes with an outer diameter of 5 mm via the interfacial diffusion method. (B) Photography of  
21 synthesis of powder SNFSIX-Cu-TPA utilizing 20-mL glass tubes with an outer diameter of 20  
22 mm via the interfacial diffusion method.  
23 **Figure S2.** Photography of single-crystal SNFSIX-Cu-TPA.  
24 **Figure S3.** Schematic views of the 3D frameworks and calculated pore surface of SNFSIX-Cu-  
25 TPA. Accessible Connolly surface determined by using a probe with a radius of 1.2 Å. The voids  
26 of SNFSIX-Cu-TPA generated with a probe with a radius of 1.2 Å.  
27 **Figure S4.** PXRD pattern of as-synthesized and simulated SIFSIX-Cu-TPA.  
28 **Figure S5.** Calculation of BET surface area for SNFSIX-Cu-TPA and SIFSIX-Cu-TPA derived  
29 from nitrogen adsorption isotherm at 77 K.  
30 **Figure S6.** Experimental SO<sub>2</sub> adsorption isotherms at 298/273 K and DSLF model fitting curve of  
31 SNFSIX-Cu-TPA.  
32 **Figure S7.** Experimental CO<sub>2</sub> adsorption isotherms at 298/273 K and DSLF model fitting curve of  
33 SNFSIX-Cu-TPA.  
34 **Figure S8.** Experimental N<sub>2</sub> adsorption isotherms at 298/273 K and DSLF model fitting curve of  
35 SNFSIX-Cu-TPA.  
36 **Figure S9.** Experimental SO<sub>2</sub> adsorption isotherms at 298/273 K and DSLF model fitting curve of  
37 SIFSIX-Cu-TPA.  
38 **Figure S10.** Experimental CO<sub>2</sub> adsorption isotherms at 298/273 K and DSLF model fitting curve  
39 of SIFSIX-Cu-TPA.  
40 **Figure S11.** Experimental N<sub>2</sub> adsorption isotherms at 298 K and DSLF model fitting curve of  
41 SNFSIX-Cu-TPA.  
42 **Figure S12.** (A) The SO<sub>2</sub>/CO<sub>2</sub> and SO<sub>2</sub>/N<sub>2</sub> sorption selectivity of SIFSIX-Cu-TPA based on IAST  
43 for the 10/90, 1/99 and 50/50 mixture of SO<sub>2</sub>/CO<sub>2</sub> or SO<sub>2</sub>/N<sub>2</sub> at 298 K.  
44 **Figure S13.** Heat of adsorption (Q<sub>st</sub>) for both SO<sub>2</sub> and CO<sub>2</sub> as a function of the gas loading  
45 amount determined from a virial fit to isotherms collected at 298 K and 273 K.  
46 **Figure S14.** Snapping shots of within the SNFSIX-Cu-TPA structure at 1 bar and 298 K from  
47 GCMC simulation results.  
48 **Figure S15.** The optimized structure of SNFSIX-Cu-TPA for DFT calculation.  
49 **Figure S16.** The optimized structure of SIFSIX-Cu-TPA for DFT calculation.  
50 **Figure S17.** The DFT optimized gas adsorption configuration in SIFSIX-Cu-TPA at Binding sites  
51 1 of SO<sub>2</sub> and CO<sub>2</sub>.  
52 **Figure S18.** Experimental fix-bed breakthrough curves of three cycling tests in the SO<sub>2</sub>/CO<sub>2</sub>/N<sub>2</sub>  
53 mixture on SNFSIX-Cu-TPA at 298 K by activation at room temperature under vacuum for 12 h.  
54 (2000 ppm SO<sub>2</sub>, 10 vol.% CO<sub>2</sub>, 89.8 vol.% N<sub>2</sub>; flow rate: 20 mL/min).

55 **Figure S19.** Repeated adsorption-desorption isotherms of SO<sub>2</sub> at 298 K and 1 bar on SNFSIX-Cu-  
56 TPA.

57 **Table S1.** Single crystal data and structure refinement for SNFSIX-Cu-TPA.

58 **Table S2.** The adsorption capacities of SO<sub>2</sub> on various MOFs at 298 K.

59 **Table S3.** BET report for MFSIX-Cu-TPA.

60 **Table S4.** Comparison of utilization efficiency per anions in anion pillared MOFs used in SO<sub>2</sub> and  
61 CO<sub>2</sub> adsorption.

62 **Table S5.** Fitting parameters of DSLF model in SNFSIX-Cu-TPA for adsorption isotherms at  
63 298/273 K.

64 **Table S6.** Fitting parameters of DSLF model in SIFSIX-Cu-TPA for adsorption isotherms at  
65 298/273 K.

66 **Table S7.** Virial fittings for calculating isosteric heat of adsorption of SO<sub>2</sub> and CO<sub>2</sub> on two MFSIX-  
67 Cu-TPA.

68 **Table S8.** Calculated the static binding energies in MFSIX-Cu-TPA

69

70

71

72

73

74

75

76

77

78

79

80

**Number of pages:25**

81

82

**Number of figures: 19**

83

84

**Number of tables: 8**

85

86

## **Section S1. Chemicals and materials**

87 All chemicals are commercially available and used directly without further purification.

| <b>Name</b>                                          | <b>Supplier</b>  | <b>Purity (%)</b> | <b>CAS-Number</b> |
|------------------------------------------------------|------------------|-------------------|-------------------|
| Cu(NO <sub>3</sub> ) <sub>2</sub> ·3H <sub>2</sub> O | Macklin          | 99                | 100-21-0          |
| Tri(pyridin-4-yl) amine (TPA)                        | Bide             | 98                | 153467-50-6       |
| (NH <sub>4</sub> ) <sub>2</sub> SnF <sub>4</sub>     | Macklin          | 99                | 16919-24-7        |
| (NH <sub>4</sub> ) <sub>2</sub> SiF <sub>4</sub>     | Aladdin          | 99                | 16919-19-0        |
| Methanol                                             | Macklin          | 99.5              | 64-17-5           |
| 2 vol% SO <sub>2</sub> in N <sub>2</sub>             | Wetry (Shanghai) | 99.999            | 7727-37-9         |
| CO <sub>2</sub>                                      | Wetry (Shanghai) | 99.999            | 7727-37-9         |
| N <sub>2</sub>                                       | Air liquid       | 99.5              | 7727-37-9         |
| deionized water H <sub>2</sub> O                     | Laboratory       | Self-made         | -                 |

88

89

90

91

## Section S2. Equipment setup

92

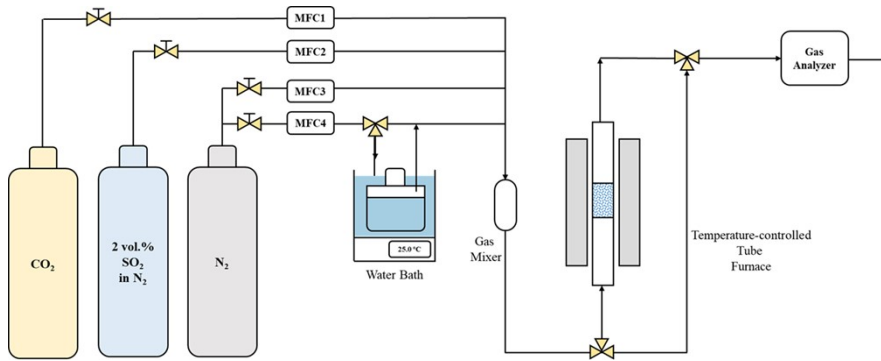

93 **Scheme S1.** A schematic illustration of breakthrough experiments in the fixed-bed reaction system.

94

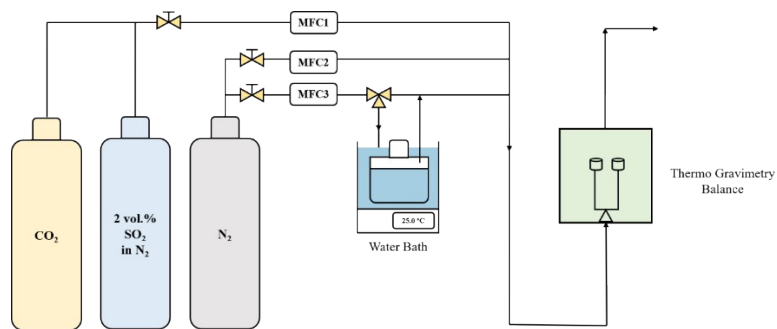

95 **Scheme S2.** A schematic illustration of adsorption-desorption cycling tests in the *in-situ* thermal-  
96 gravimetric balance system.

97

### Section S3. Single-crystal X-ray diffraction:

99 **Single-crystal X-ray diffraction:** Single-crystal X-ray diffraction data were acquired by a  
100 Bruker D8 Venture Metaljet PHOTON II diffractometer equipped with GaK $\alpha$  radiation  
101 ( $\lambda = 1.34139 \text{ \AA}$ ). The suitable crystal was selected and kept at 193 K during data  
102 collection. The structural determination was performed using Olex2, employing the  
103 Direct Methods with the SHELXS, followed by refinement using the SHELXL  
104 refinement package and Least Squares minimization. Anisotropic refinement was  
105 applied to all nonhydrogen atoms, while hydrogen atoms bonded with carbon atoms  
106 were included at calculated positions and refined using a riding model.

### 107 Section S4. Density functional theory (DFT) calculations

108 The first-principles density functional theory (DFT) calculations for the determination  
109 of static adsorption energies were carried out using the CP2K code. The adsorption  
110 energy can provide valuable insights into the interactions between the SO<sub>2</sub>/CO<sub>2</sub>/N<sub>2</sub> and  
111 the MFSIX-Cu-TPA. All the simulations employed a combination of Gaussian and  
112 plane-wave basis sets. The core electrons were represented with norm-conserving  
113 Goedecker-Teter-Hutter pseudopotentials. Additionally, the valence electron wave  
114 function was expanded in a double-zeta basis set with polarization functions. This is  
115 added by an auxiliary plane wave basis set. A kinetic cut-off energy of 360 eV was  
116 utilized to ensure accurate calculations. The exchange-correlation function employed  
117 in these calculations was the Perdew-Burke-Enzerhof (PBE) generalized gradient  
118 approximation. Each configuration was optimized with the Broyden-Fletcher-  
119 Goldfarb-Shanno (BGFS) algorithm, with self-consistent field (SCF) convergence  
120 criteria of  $1.0 \times 10^{-6}$  au. Grimme's DFT-D3 model was also utilized to account for van  
121 der Waals interactions, providing a more accurate description of the whole system.

## 123      **Section S5. Grand Canonical Monte Carlo (GCMC) simulations**

124 Grand Canonical Monte Carlo (GCMC) simulations of single-component adsorption  
125 isotherms were all performed using RASPA package.<sup>1</sup>The structure of SNFSIX-Cu-  
126 TPA was firstly optimized via DFT geometry optimization in the Section S5. All Monte  
127 Carlo simulations were performed using the Lennard-Jones (L-J) potential in a rigid  
128 framework. The Lennard-Jones parameters for adsorbate-host interactions were  
129 obtained using the Lorentz-Berthelot mixing rules. The force field parameters for CO<sub>2</sub>  
130 and N<sub>2</sub> were taken from the TraPPE force field, where both molecules were considered  
131 rigid.<sup>2</sup> Additionally, the force field parameters for SO<sub>2</sub> were taken from Ketko's  
132 optimized SO<sub>2</sub> model, which includes a harmonic O–S–O bending angle potential with  
133 the S–O bond length fixed.<sup>3</sup> Van der Waals interactions were calculated using a 12 Å  
134 cutoff, and the minimum image convention was satisfied using a 2x2x2 supercell.  
135 Besides, the Ewald summation method was used to compute Coulomb interactions. For  
136 all GCMC simulations, sampling began after 1x10<sup>4</sup> initialization cycles and  
137 thermodynamic properties were sampled over the next 10<sup>5</sup> cycles.

138

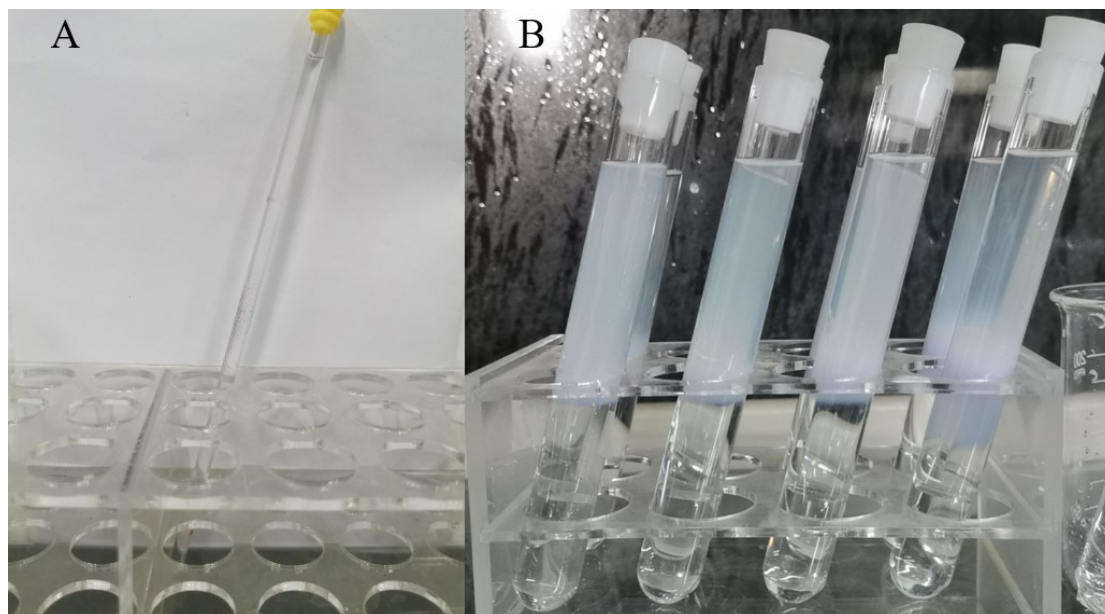

140

141 **Figure S1.** (A) Photography of synthesis of single-crystal SNFSIX-Cu-TPA utilizing NMR glass  
142 tubes with an outer diameter of 5 mm via the slow diffusion method. (B) Photography of synthesis  
143 of powder SNFSIX-Cu-TPA utilizing 20-mL glass tubes with an outer diameter of 20 mm via the  
144 interfacial diffusion method.

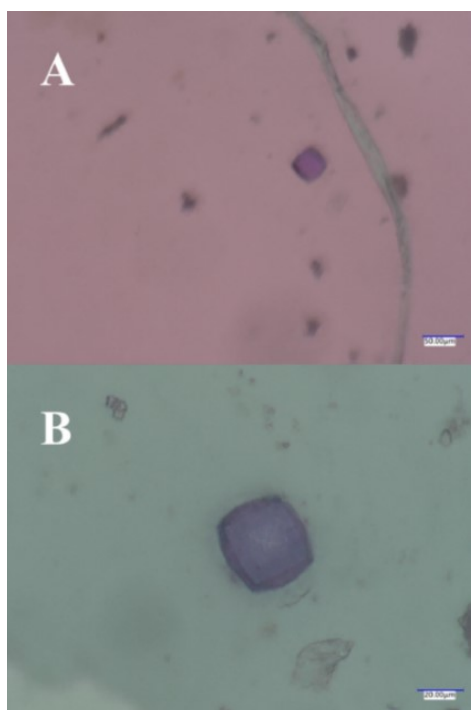

145

146

**Figure S2.** Photography of single-crystal SNFSIX-Cu-TPA.



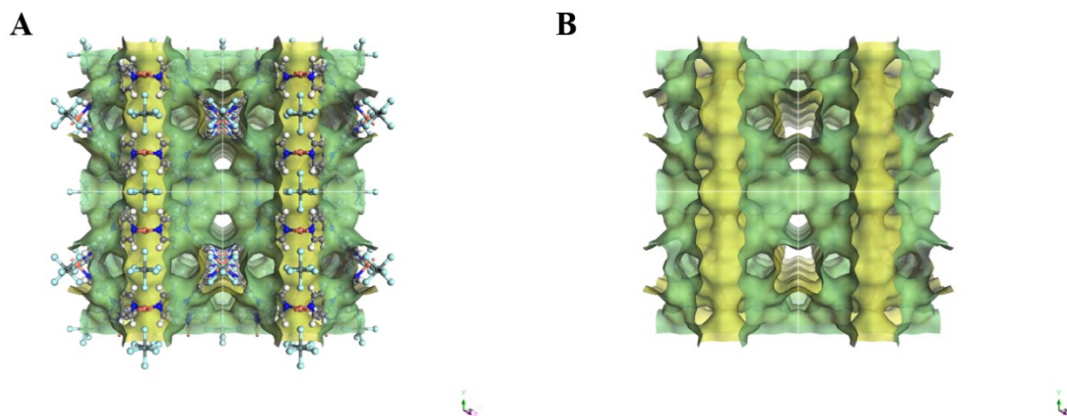

147

148 **Figure S3.** Schematic views of the 3D frameworks and calculated pore surface of SNFSIX-Cu-  
 149 TPA. Accessible Connolly surface determined by using a probe with a radius of 1.2 Å. The voids  
 150 of SNFSIX-Cu-TPA generated with a probe with a radius of 1.2 Å.

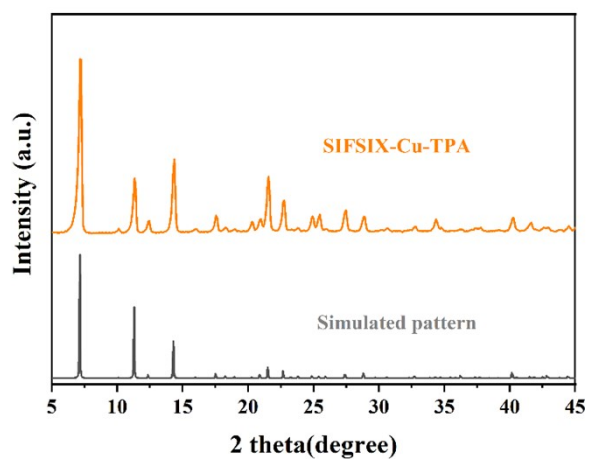

151

152

**Figure S4.** PXRD pattern of as-synthesized and simulated SIFSIX-Cu-TPA.

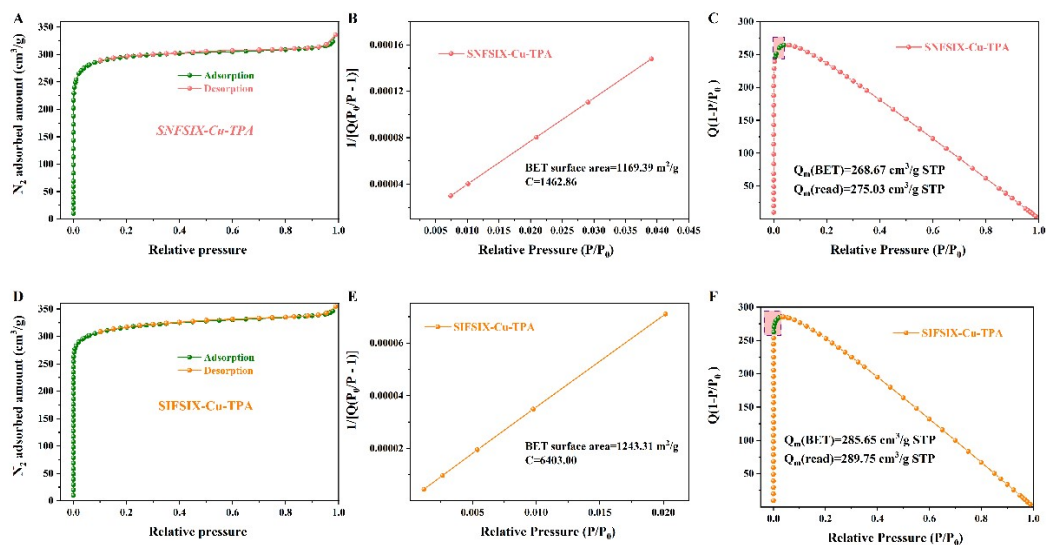

153

154 **Figure S5.** Calculation of BET surface area for SNFSIX-Cu-TPA and SIFSIX-Cu-TPA derived  
 155 from nitrogen adsorption isotherm at 77 K.

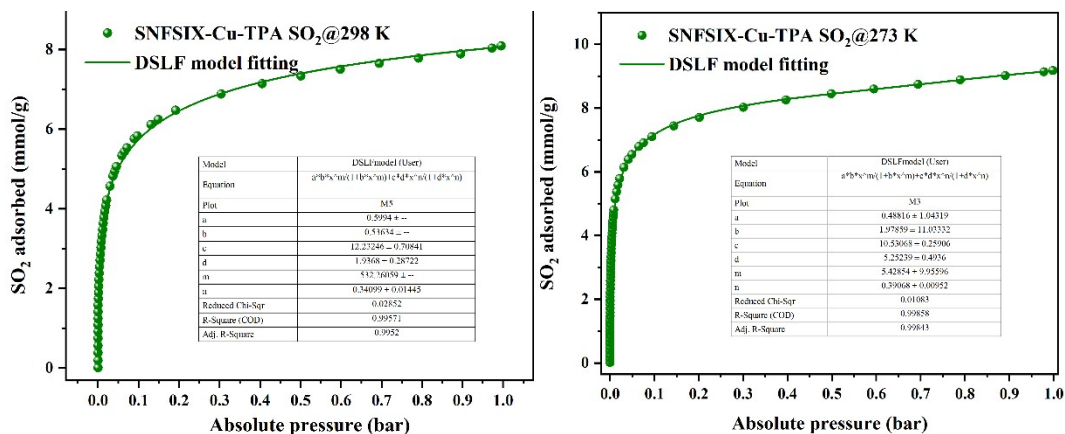

156

157 Figure S6. Experimental SO<sub>2</sub> adsorption isotherms at 298/273 K and DSLF model fitting curve of  
158 SNFSIX-Cu-TPA.

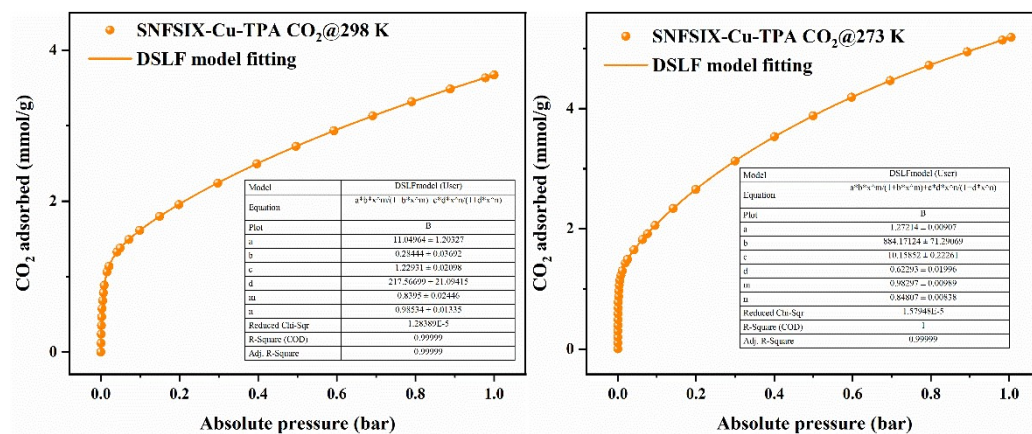

159

160 Figure S7. Experimental CO<sub>2</sub> adsorption isotherms at 298/273 K and DSLF model fitting curve of  
161 SNFSIX-Cu-TPA.

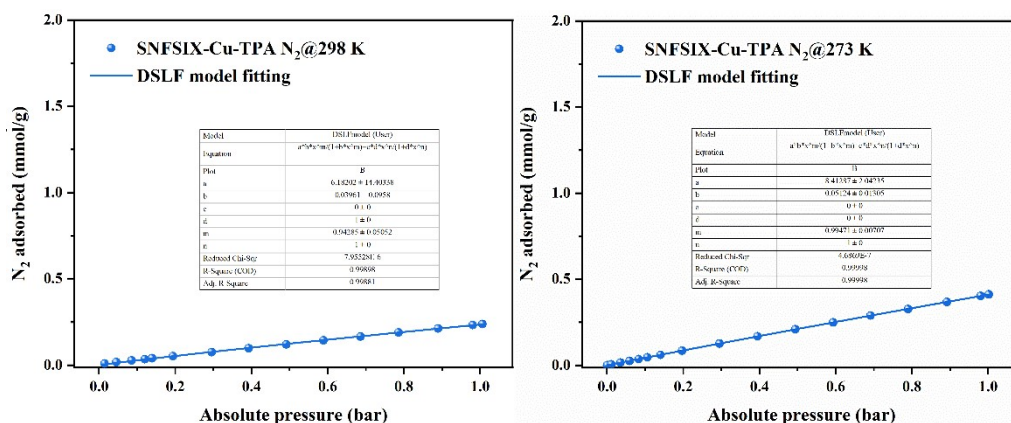

162

163 Figure S8. Experimental N<sub>2</sub> adsorption isotherms at 298/273 K and DSLF model fitting curve of  
164 SNFSIX-Cu-TPA.

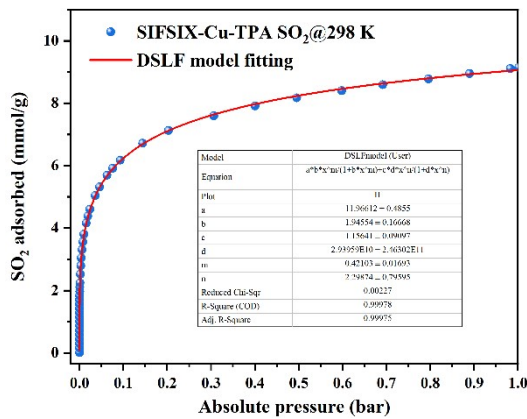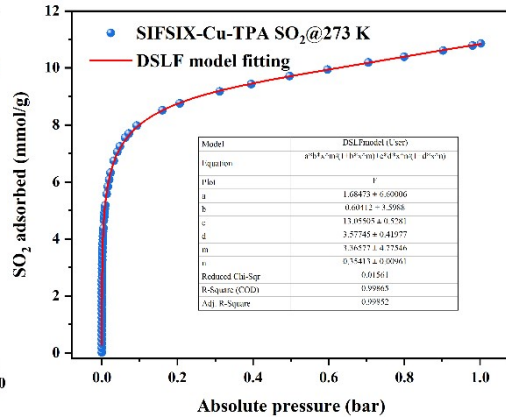

165

166 **Figure S9.** Experimental SO<sub>2</sub> adsorption isotherms at 298/273 K and DSLF model fitting curve of  
167 SIFSIX-Cu-TPA.

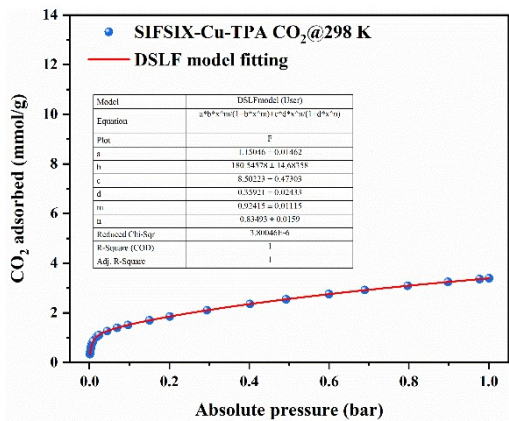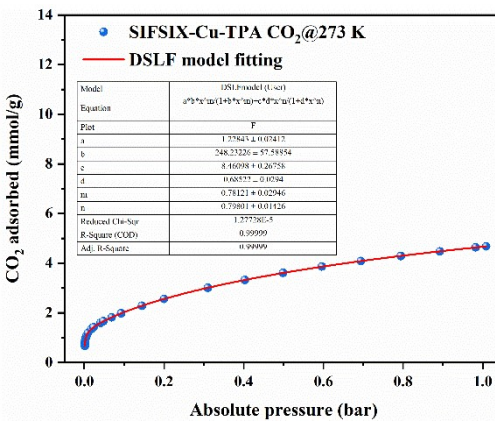

168

169 **Figure S10.** Experimental CO<sub>2</sub> adsorption isotherms at 298/273 K and DSLF model fitting curve  
170 of SIFSIX-Cu-TPA.

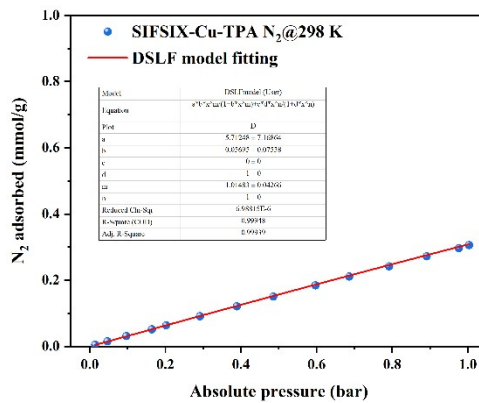

171

172 **Figure S11.** Experimental N<sub>2</sub> adsorption isotherms at 298 K and DSLF model fitting curve of  
173 SNFSIX-Cu-TPA.

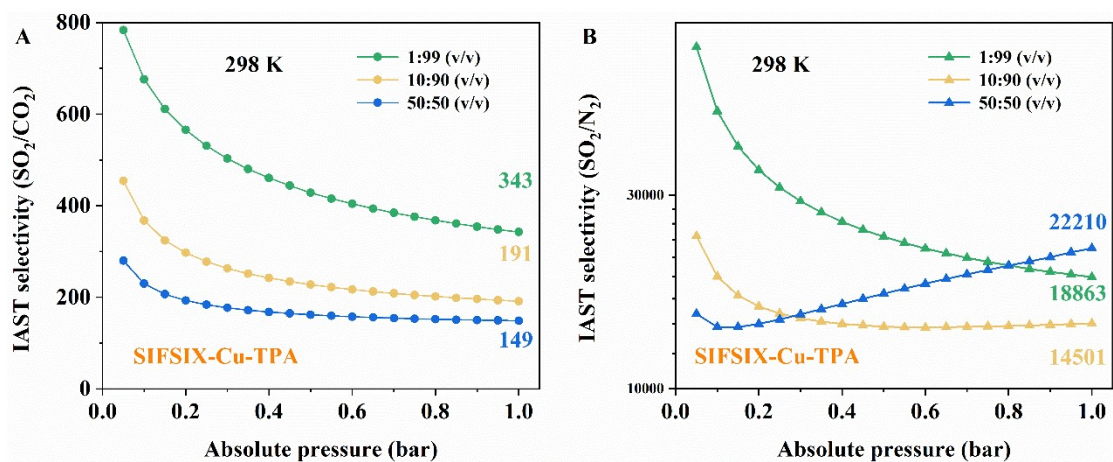

174  
 175 **Figure S12.** (A) The  $\text{SO}_2/\text{CO}_2$  and  $\text{SO}_2/\text{N}_2$  sorption selectivity of SIFSIX-Cu-TPA based on IAST  
 176 for the 10/90, 1/99 and 50/50 mixture of  $\text{SO}_2/\text{CO}_2$  or  $\text{SO}_2/\text{N}_2$  at 298 K.

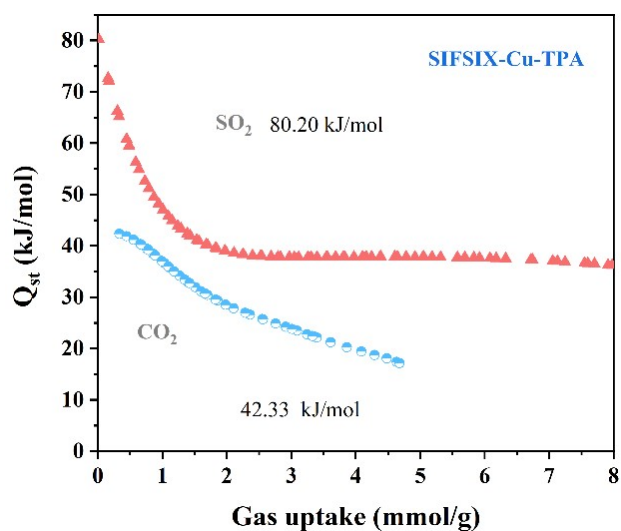

177  
 178 **Figure S13.** Heat of adsorption ( $Q_{st}$ ) for both  $\text{SO}_2$  and  $\text{CO}_2$  as a function of the gas loading  
 179 amount determined from a virial fit to isotherms collected at 298 K and 273 K.

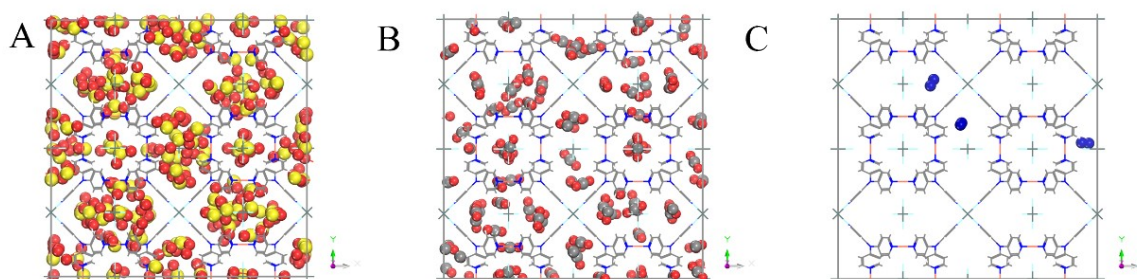

180  
 181 **Figure S14.** Snapping shots of (A)  $\text{SO}_2$ , (B)  $\text{CO}_2$ , and (C)  $\text{N}_2$  molecules within the SIFSIX-Cu-  
 182 TPA structure at 1 bar and 298 K from GCMC simulation results.

183

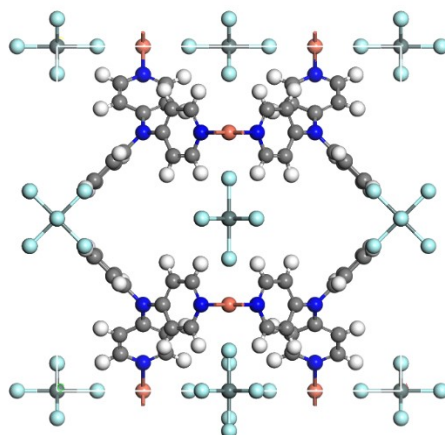

184  
185

**Figure S15.** The optimized structure of SNFSIX-Cu-TPA for DFT calculation.

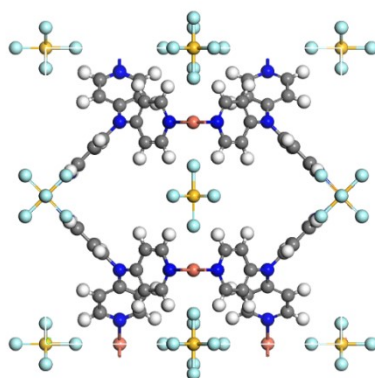

186  
187

**Figure S16.** The optimized structure of SIFSIX-Cu-TPA for DFT calculation.

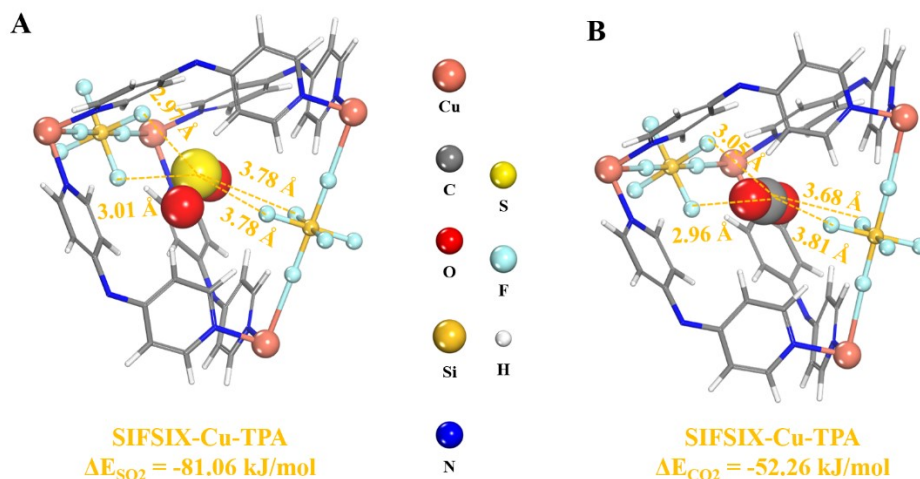

188  
189  
190

**Figure 17.** The DFT optimized gas adsorption configuration in SIFSIX-Cu-TPA at Binding sites 1 of SO<sub>2</sub> and CO<sub>2</sub>.

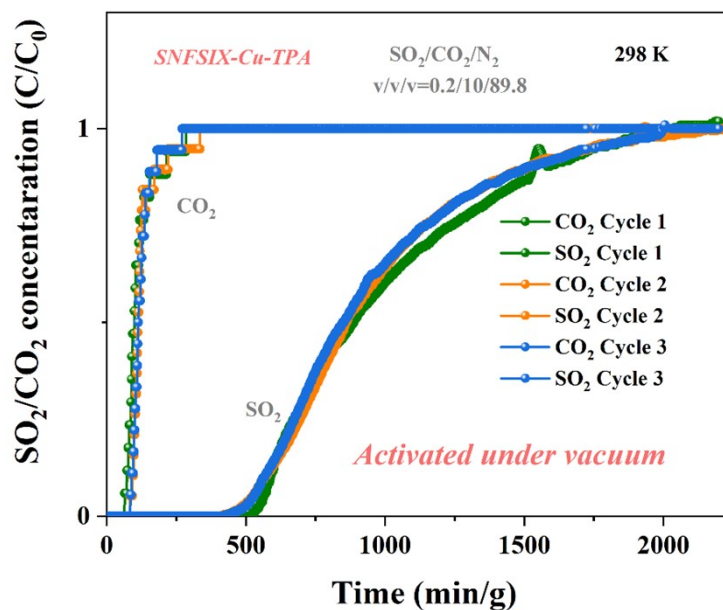

191

192 **Figure S18.** Experimental fix-bed breakthrough curves of three cycling tests in the  $\text{SO}_2/\text{CO}_2/\text{N}_2$   
 193 mixture on SNFSIX-Cu-TPA at 298 K by activation at room temperature under vacuum for 12 h.

194

(2000 ppm  $\text{SO}_2$ , 10 vol.%  $\text{CO}_2$ , 89.8 vol.%  $\text{N}_2$ ; flow rate: 20 mL/min).

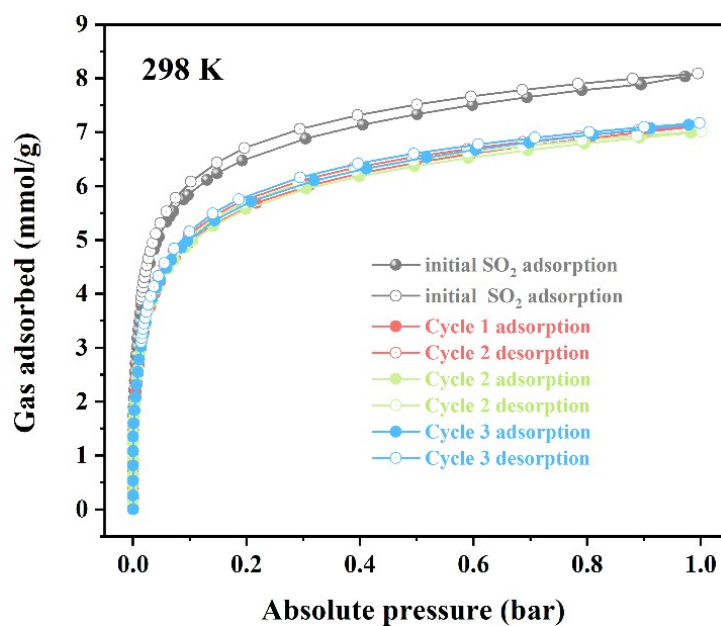

195

196 **Figure S19.** Repeated adsorption-desorption isotherms of  $\text{SO}_2$  at 298 K and 1 bar on SNFSIX-Cu-  
 197 TPA.

198

**Table S1-1. Single crystal data and structure refinement for SNFSIX-Cu-TPA**

| <b>Compound</b>                                | <b>SNFSIX-Cu-TPA</b>                                         |
|------------------------------------------------|--------------------------------------------------------------|
| Empirical formula                              | $C_{60}H_{48}Cu_3F_{18}N_{16}Sn_3$                           |
| Formula weight                                 | 1881.83                                                      |
| Temperature/K                                  | 193.00                                                       |
| Crystal system                                 | cubic                                                        |
| Space group                                    | $Pm-3n$                                                      |
| a/Å                                            | 17.6072(4)                                                   |
| b/Å                                            | 17.6072(4)                                                   |
| c/Å                                            | 17.6072(4)                                                   |
| $\alpha/^\circ$                                | 90                                                           |
| $\beta/^\circ$                                 | 90                                                           |
| $\gamma/^\circ$                                | 90                                                           |
| Volume/Å <sup>3</sup>                          | 5458.5(3)                                                    |
| Z                                              | 2                                                            |
| $\rho$ calc g/cm <sup>3</sup>                  | 1.145                                                        |
| $\mu$ /mm <sup>-1</sup>                        | 7.144                                                        |
| $F(000)$                                       | 1838.0                                                       |
| Crystal size/mm <sup>3</sup>                   | 0.13 × 0.12 × 0.1                                            |
| Radiation                                      | GaK $\alpha$ ( $\lambda = 1.34139$ )                         |
| 2 $\theta$ range for data collection/ $^\circ$ | 6.176 to 120.214                                             |
| Index ranges                                   | $-22 \leq h \leq 21, -20 \leq k \leq 22, -19 \leq l \leq 22$ |
| Reflections collected                          | 45287                                                        |
| Independent reflections                        | 1139 [Rint = 0.0715, Rsigma = 0.0202]                        |
| Data/restraints/parameters                     | 1139/37/68                                                   |
| Goodness-of-fit on F2                          | 1.073                                                        |
| Final R indexes [ $I \geq 2\sigma(I)$ ]        | $R_1 = 0.0299, wR_2 = 0.0854$                                |
| Final R indexes [all data]                     | $R_1 = 0.0356, wR_2 = 0.0902$                                |
| Largest diff. peak/hole / e Å <sup>-3</sup>    | 0.40/-0.49                                                   |

**Table S1-2. Single crystal data and structure refinement for SIFSIX-Cu-TPA**

| <b>Compound</b>                             | <b>SIFSIX-Cu-TPA</b>                                                                            |
|---------------------------------------------|-------------------------------------------------------------------------------------------------|
| Empirical formula                           | C <sub>60</sub> H <sub>48</sub> Cu <sub>3</sub> F <sub>18</sub> N <sub>16</sub> Si <sub>3</sub> |
| Formula weight                              | 1610.03                                                                                         |
| Temperature/K                               | 193.00                                                                                          |
| Crystal system                              | cubic                                                                                           |
| Space group                                 | <i>Pm-3n</i>                                                                                    |
| a/Å                                         | 17.5513(2)                                                                                      |
| b/Å                                         | 17.5513(2)                                                                                      |
| c/Å                                         | 17.5513(2)                                                                                      |
| α/°                                         | 90                                                                                              |
| β/°                                         | 90                                                                                              |
| γ/°                                         | 90                                                                                              |
| Volume/Å <sup>3</sup>                       | 5406.64(18)                                                                                     |
| Z                                           | 2                                                                                               |
| ρ calc g/cm <sup>3</sup>                    | 0.989                                                                                           |
| μ/mm <sup>-1</sup>                          | 3.734                                                                                           |
| F(000)                                      | 1622.0                                                                                          |
| Crystal size/mm <sup>3</sup>                | 0.13 × 0.12 × 0.1                                                                               |
| Radiation                                   | GaKα (λ = 1.34139)                                                                              |
| 2θ range for data collection/°              | 9.804 to 120.658                                                                                |
| Index ranges                                | -22 ≤ h ≤ 21, -20 ≤ k ≤ 22, -22 ≤ l ≤ 16                                                        |
| Reflections collected                       | 49726                                                                                           |
| Independent reflections                     | 1127 [Rint = 0.0492, Rsigma = 0.0128]                                                           |
| Data/restraints/parameters                  | 1127/0/52                                                                                       |
| Goodness-of-fit on F2                       | 1.098                                                                                           |
| Final R indexes [I ≥ 2σ (I)]                | R <sub>1</sub> = 0.0533, wR <sub>2</sub> = 0.1642                                               |
| Final R indexes [all data]                  | R <sub>1</sub> = 0.0589, wR <sub>2</sub> = 0.1726                                               |
| Largest diff. peak/hole / e Å <sup>-3</sup> | 0.89/-0.31                                                                                      |



**Table S2. The adsorption capacities of SO<sub>2</sub> on various MOFs at 298 K**

| Materials     | Surface area (m <sup>2</sup> /g) | SO <sub>2</sub> uptake at (mmol/g) |          |       | Selectivity at 10/90            |                                  | SO <sub>2</sub> Q <sub>st</sub> (kJ/mol) | Cycling Stability | Water stability | Ref       |
|---------------|----------------------------------|------------------------------------|----------|-------|---------------------------------|----------------------------------|------------------------------------------|-------------------|-----------------|-----------|
|               |                                  | 0.002 bar                          | 0.01 bar | 1 bar | SO <sub>2</sub> /N <sub>2</sub> | SO <sub>2</sub> /CO <sub>2</sub> |                                          |                   |                 |           |
| SNFSIX-Cu-TPA | 1169                             | 2.22                               | 3.33     | 8.09  | >10000                          | 88                               | 58.81                                    | ✓                 | ✓               | This work |
| SIFSIX-Cu-TPA | 1243                             | 2.52                               | 3.80     | 9.15  | >10000                          | 191                              | 80.2                                     | -                 | -               |           |
| KAUST-7       | 280                              | 0.59*                              | 2.04*    | 2.64* | n/a                             | n/a                              | 64.8*                                    | ✓                 | ✓               | 4         |
| KAUST-8       | 258                              | 0.44*                              | 1.59*    | 2.91* | n/a                             | n/a                              | 73.9*                                    | ✓                 | ✓               |           |
| SIFSIX-1-Cu   | 1337                             | 1.80                               | 3.43     | 11.01 | 1241                            | 70.7                             | 36.1                                     | ✓                 | ×               | 5         |
| SIFSIX-2-Cu-i | 735                              | 2.31                               | 4.16     | 6.90  | 1017                            | 87.1                             | 38.1                                     | ✓                 | ×               |           |
| SIFSIX-3-Zn   | 250                              | 0.98                               | 1.68     | 2.10  | 371                             | n/a                              | 45.2                                     | n/a               | ×               |           |
| SIFSIX-3-Ni   | 368                              | 1.39                               | 2.43     | 2.74  | 276                             | n/a                              | 43.2                                     | n/a               | ×               |           |
| MFM-300-In    | 1071                             | 1.06                               | 2.17     | 8.28  | 2700                            | 50                               | 39.6                                     | ✓                 | ✓               | 6         |
| MFM-300-Al    | 1037                             | -                                  | -        | 7.1   | n/a                             | n/a                              | -                                        | ✓                 | n/a             |           |
| MFM-300-Sc    | 1390                             | -                                  | -        | 9.4   | 31                              | 31                               | 36.2                                     | ✓                 | n/a             |           |
| MOF-177       | 4100                             | n/a                                | 0.13     | 25.8  | n/a                             | n/a                              | n/a                                      | ×                 | ×               | 7         |
| MIL-160       | 1170                             | 1.93                               | 3.10     | 7.2   | 6426                            | -                                | 48.68                                    | ✓                 | ✓               |           |
| MFM-202a      | 2220                             | -                                  | -        | 10.2  | n/a                             | n/a                              | 35                                       | ×                 | n/a             | 8         |
| Co-Gallate    | 494                              | 2.67                               | 3.37     | 4.49  | 55                              | 25                               | 54.1                                     | ✓                 | ✓               | 9         |
| Mg-Gallate    | 576                              | 3.99                               | 4.26     | 5.38  | >10000                          | 143                              | 55.6                                     | ✓                 | ✓               |           |
| Ni-Gallate    | 455                              | 4.65                               | 4.87     | 5.81  | >10000                          | 321                              | 60.3                                     | ✓                 | n/a             |           |

|                 |      |      |       |       |        |        |         |   |     |    |
|-----------------|------|------|-------|-------|--------|--------|---------|---|-----|----|
| DUT-67-HCl      | 1178 | <0.5 | <1    | 9.3   | 9982   | 33     | 36.0    | √ | √   | 10 |
| NU-200          | 1260 |      | 2.52* | 11.7  |        |        | 38      | √ | √   | 11 |
| CC3             | 402  | n/a  | n/a   | 2.78  | n/a    | n/a    | 38.5    | × | n/a |    |
| RCC3            | -    | n/a  | n/a   | 12.34 | n/a    | n/a    | 82.8    | × | n/a | 12 |
| 6FT-RCC3        | 396  | n/a  | 3.57  | 13.78 | n/a    | n/a    | 43.0    | √ | n/a |    |
| MFM-190(F)      | 2538 | n/a  | n/a   | 18.3  | 5.2    | n/a    | 45*     | √ | n/a | 13 |
| MFM-101         | 2300 | n/a  | n/a   | 18.7  | 2.5    | n/a    | 37*     | √ | n/a |    |
| Viologen-POF    | 9.4  | 1.45 | 4.53  | 11.3  | 467    | n/a    | 38.3    | √ | √   | 14 |
| P(Ph-4MVIIm-Br) | 158  | 1.55 | 2.43  | 8.12  | >10000 | >10000 | 76(cal) | √ | n/a | 15 |

201

202

203

**Table S3. BET report for MFSIX-Cu-TPA**

| Compound                        | SNFSIX-Cu-TPA                             |
|---------------------------------|-------------------------------------------|
| BET surface area:               | 1,169.39 ± 1.34 m <sup>2</sup> /g         |
| Slope:                          | 0.003720 ± 0.000004 g/cm <sup>3</sup> STP |
| Y-intercept:                    | 0.000003 ± 0.000000 g/cm <sup>3</sup> STP |
| C:                              | 1,462.86                                  |
| Qm:                             | 268.67 cm <sup>3</sup> /g STP             |
| Correlation coefficient:        | 0.9999980                                 |
| Molecular cross-sectional area: | 0.16 nm <sup>2</sup>                      |

204

| Compound                        | SIFSIX-Cu-TPA                             |
|---------------------------------|-------------------------------------------|
| BET surface area:               | 1,243.31 ± 4.02 m <sup>2</sup> /g         |
| Slope:                          | 0.003500 ± 0.000011 g/cm <sup>3</sup> STP |
| Y-intercept:                    | 0.000001 ± 0.000000 g/cm <sup>3</sup> STP |
| C:                              | 6,403.00                                  |
| Qm:                             | 285.65 cm <sup>3</sup> /g STP             |
| Correlation coefficient:        | 0.9999843                                 |
| Molecular cross-sectional area: | 0.16 nm <sup>2</sup>                      |

205

206

**Table S4 Comparison of utilization efficiency per anions in anion pillared MOFs used in SO<sub>2</sub> and CO<sub>2</sub> adsorption at 298 K**

| Materials     | MW<br>(g/mol) | Formular                                                                           | SO <sub>2</sub> /MF <sub>6</sub> <sup>2-</sup> (mol/mol) |       | CO <sub>2</sub> /MF <sub>6</sub> <sup>2-</sup> (mol/mol) |       | Ref       |
|---------------|---------------|------------------------------------------------------------------------------------|----------------------------------------------------------|-------|----------------------------------------------------------|-------|-----------|
|               |               |                                                                                    | 0.002 bar                                                | 1 bar | 0.1 bar                                                  | 1 bar |           |
| SNFSIX-Cu-TPA | 627.28        | Cu(SnF <sub>6</sub> )(C <sub>10</sub> H <sub>8</sub> N <sub>2</sub> ) <sub>2</sub> | 1.39                                                     | 5.07  | 1.01                                                     | 2.30  | This work |
| SIFSIX-Cu-TPA | 536.68        | Cu(SiF <sub>6</sub> )(C <sub>10</sub> H <sub>8</sub> N <sub>2</sub> ) <sub>2</sub> | 1.35                                                     | 4.91  | 0.82                                                     | 1.82  |           |
| KAUST-7       | 422.91        | Ni(NbOF <sub>5</sub> )(C <sub>4</sub> H <sub>4</sub> N <sub>2</sub> ) <sub>2</sub> | 0.25*                                                    | 1.12* | 0.93*                                                    | 0.98* | 4         |
| KAUST-8       | 341.09        | Ni(AlOF <sub>5</sub> )(C <sub>4</sub> H <sub>4</sub> N <sub>2</sub> ) <sub>2</sub> | 0.15*                                                    | 0.99* | 0.77*                                                    | 0.90* |           |
| SIFSIX-1-Cu   | 517.78        | Cu(SiF <sub>6</sub> )(C <sub>10</sub> H <sub>8</sub> N <sub>2</sub> ) <sub>2</sub> | 0.93                                                     | 5.70  | 0.21                                                     | 2.54  |           |
| SIFSIX-2-Cu-i | 565.78        | Cu(SiF <sub>6</sub> )(C <sub>12</sub> H <sub>8</sub> N <sub>2</sub> ) <sub>2</sub> | 1.31                                                     | 3.90  | 0.86                                                     | 2.77  | 16        |
| SIFSIX-3-Zn   | 367.64        | Zn(SiF <sub>6</sub> )(C <sub>4</sub> H <sub>4</sub> N <sub>2</sub> ) <sub>2</sub>  | 0.36                                                     | 0.77  | 0.97                                                     | 0.90  |           |
| SIFSIX-3-Ni   | 360.96        | Ni(SiF <sub>6</sub> )(C <sub>4</sub> H <sub>4</sub> N <sub>2</sub> ) <sub>2</sub>  | 0.50                                                     | 0.99  | 1.04                                                     | 0.96  |           |

**Table S5 Fitting parameters of DSLF model in SNFSIX-Cu-TPA for adsorption isotherms at 298/273 K**

| <b>Temp.</b> | <b>Gas</b>      | <b>q<sub>1</sub></b><br><b>(mmol/g)</b> | <b>k<sub>1</sub><sup>[a]</sup></b> | <b>m</b> | <b>q<sub>2</sub></b><br><b>(mmol/g)</b> | <b>k<sub>2</sub><sup>[a]</sup></b> | <b>n</b> | <b>R<sup>2</sup></b> |
|--------------|-----------------|-----------------------------------------|------------------------------------|----------|-----------------------------------------|------------------------------------|----------|----------------------|
| 273 K        | SO <sub>2</sub> | 0.48196                                 | 1.97859                            | 5.42854  | 10.53068                                | 5.25239                            | 0.39068  | 0.99858              |
|              | CO <sub>2</sub> | 1.27214                                 | 884.17124                          | 0.98297  | 10.15852                                | 0.62293                            | 0.84807  | 0.99999              |
|              | N <sub>2</sub>  | 8.41287                                 | 0.05124                            | 0.99471  | 0                                       | 1                                  | 1        | 0.99998              |
| 298 K        | SO <sub>2</sub> | 1.42401                                 | 14.89018                           | 1.12941  | 9.07148                                 | 2.62589                            | 0.32955  | 0.99608              |
|              | CO <sub>2</sub> | 1.22931                                 | 217.56699                          | 0.98534  | 11.04964                                | 0.28444                            | 0.8395   | 0.99999              |
|              | N <sub>2</sub>  | 6.18202                                 | 0.03961                            | 0.94285  | 0                                       | 1                                  | 1        | 0.99898              |

208

**Table S6 Fitting parameters of DSLF model in SIFSIX-Cu-TPA for adsorption isotherms at 298/273 K**

| Temp. | Gas             | q <sub>1</sub><br>(mmol/g) | k <sub>1</sub> <sup> a </sup> | m       | q <sub>2</sub><br>(mmol/g) | k <sub>2</sub> <sup> a </sup> | n       | R <sup>2</sup> |
|-------|-----------------|----------------------------|-------------------------------|---------|----------------------------|-------------------------------|---------|----------------|
| 273 K | SO <sub>2</sub> | 1.68473                    | 0.60412                       | 3.36577 | 13.05505                   | 3.57745                       | 0.35413 | 0.99865        |
|       | CO <sub>2</sub> | 1.22843                    | 248.23226                     | 0.78121 | 8.46098                    | 0.68522                       | 0.79801 | 0.99999        |
| 298 K | SO <sub>2</sub> | 3.19408                    | 2.40069                       | 0.78172 | 9.4933                     | 2.53785                       | 0.3044  | 0.99694        |
|       | CO <sub>2</sub> | 1.15046                    | 180.54578                     | 0.92415 | 8.50223                    | 0.35921                       | 0.83493 | 1              |
|       | N <sub>2</sub>  | 5.71248                    | 0.05695                       | 1.10483 | 0                          | 1                             | 1       | 0.99948        |

210 **Table S7 Virial fittings for calculating isosteric heat of adsorption of SO<sub>2</sub> and CO<sub>2</sub> on two**  
 211 **MFSIX-Cu-TPA.**

| Parameters     | SNFSIX-Cu-TPA   |                 | SIFSIX-Cu-TPA   |                 |
|----------------|-----------------|-----------------|-----------------|-----------------|
|                | SO <sub>2</sub> | CO <sub>2</sub> | SO <sub>2</sub> | CO <sub>2</sub> |
| a <sub>0</sub> | -7101.82764     | -4963.12        | -8242.777       | -4942.85        |
| a <sub>1</sub> | 2183.17286      | 444.9077        | 4741.30174      | -1367.63        |
| a <sub>2</sub> | -755.93045      | -328.01         | -2500.06991     | 3343.615        |
| a <sub>3</sub> | 107.92025       | 1238.455        | 711.11458       | -1873.48        |
| a <sub>4</sub> | 0.03798         | -923.341        | -117.09322      | 419.0928        |
| a <sub>5</sub> | -1.78157        | 293.5516        | 11.05846        | -12.8802        |
| a <sub>6</sub> | 0.19467         | -43.3406        | -0.55312        | -8.36515        |
| a <sub>7</sub> | -0.00681        | 2.44423         | 0.01131         | 0.89173         |
| b <sub>0</sub> | 8.41023         | 11.05115        | 5.54337         | 12.04616        |
| b <sub>1</sub> | 0.47244         | -1.02203        | 0.92572         | -1.28136        |
| R <sup>2</sup> | 0.99983         | 0.99933         | 0.99892         | 0.99961         |

212

**Table S8 Calculated the static binding energies in MFSIX-Cu-TPA**

| Materials     | Configuration        | E (Hartree)  | $\Delta E$ (kJ/mol) |
|---------------|----------------------|--------------|---------------------|
| SNFSIX-Cu-TPA |                      | -2241.541985 |                     |
| SIFSIX-Cu-TPA |                      | -2245.226329 |                     |
|               | SO <sub>2</sub>      | -42.29094325 |                     |
|               | CO <sub>2</sub>      | -37.76093178 |                     |
|               | H <sub>2</sub> O     | -17.21979577 |                     |
|               | N <sub>2</sub>       | -19.89512329 |                     |
|               | MOF1-SO <sub>2</sub> | -2283.861386 | -74.7               |
|               | Site 1               |              |                     |
|               | MOF1-CO <sub>2</sub> | -2279.320947 | -47.3               |
|               | MOF1-N <sub>2</sub>  | -2261.447985 | -28.6               |
| SNFSIX-Cu-TPA |                      |              |                     |
|               | MOF2-SO <sub>2</sub> | -2283.852558 | -51.5               |
|               | Site 2               |              |                     |
|               | MOF2-CO <sub>2</sub> | -2279.316969 | -36.9               |
|               | MOF2-N <sub>2</sub>  | -2261.444089 | -18.3               |
|               | MOF1-SO <sub>2</sub> | -2287.548145 | -81.1               |
| SIFSIX-Cu-TPA | Site 1               |              |                     |
|               | MOF1-CO <sub>2</sub> | -2283.007165 | -52.3               |

213

214



215 **References**

- 216 1 D. Dubbeldam, S. Calero, D. E. Ellis and R. Q. Snurr, *Molecular Simulation*, 2016, **42**, 81–101.  
217 2 J. J. Potoff and J. I. Siepmann, *AIChE Journal*, 2001, **47**, 1676–1682.  
218 3 M. H. Ketko, G. Kamath and J. J. Potoff, *J. Phys. Chem. B*, 2011, **115**, 4949–4954.  
219 4 M. R. Tchalala, P. M. Bhatt, K. N. Chappanda, S. R. Tavares, K. Adil, Y. Belmabkhout, A.  
220 Shkurenko, A. Cadiau, N. Heymans, G. De Weireld, G. Maurin, K. N. Salama and M. Eddaoudi,  
221 *Nat Commun*, 2019, **10**, 1328.  
222 5 Y. Zhang, P. Zhang, W. Yu, J. Zhang, J. Huang, J. Wang, M. Xu, Q. Deng, Z. Zeng and S. Deng,  
223 *ACS Appl. Mater. Interfaces*, 2019, **11**, 10680–10688.  
224 6 K. Tan, P. Canepa, Q. Gong, J. Liu, D. H. Johnson, A. Dyevoich, P. K. Thallapally, T.  
225 Thonhauser, J. Li and Y. J. Chabal, *Chem. Mater.*, 2013, **25**, 4653–4662.  
226 7 S. Yang, J. Sun, A. J. Ramirez-Cuesta, S. K. Callear, W. I. F. David, D. P. Anderson, R. Newby,  
227 A. J. Blake, J. E. Parker, C. C. Tang and M. Schröder, *Nature Chem*, 2012, **4**, 887–894.  
228 8 M. Savage, Y. Cheng, T. L. Easun, J. E. Eyley, S. P. Argent, M. R. Warren, W. Lewis, C. Murray,  
229 C. C. Tang, M. D. Frogley, G. Cinque, J. Sun, S. Rudić, R. T. Murden, M. J. Benham, A. N.  
230 Fitch, A. J. Blake, A. J. Ramirez-Cuesta, S. Yang and M. Schröder, *Advanced Materials*, 2016,  
231 **28**, 8705–8711.  
232 9 J. A. Zárate, E. Sánchez-González, D. R. Williams, E. González-Zamora, V. Martis, A. Martínez,  
233 J. Balmaseda, G. Maurin and I. A. Ibarra, *J. Mater. Chem. A*, 2019, **7**, 15580–15584.  
234 10 X.-H. Xiong, Z.-W. Wei, W. Wang, L.-L. Meng and C.-Y. Su, *J. Am. Chem. Soc.*, 2023, **145**,  
235 14354–14364.  
236 11 W. Gong, Y. Xie, T. D. Pham, S. Shetty, F. A. Son, K. B. Idrees, Z. Chen, H. Xie, Y. Liu, R. Q.  
237 Snurr, B. Chen, B. Alameddine, Y. Cui and O. K. Farha, *J. Am. Chem. Soc.*, 2022, **144**, 3737–  
238 3745.  
239 12 N. K. Gupta, A. López-Olvera, E. González-Zamora, E. Martínez-Ahumada and I. A. Ibarra,  
240 *ChemPlusChem*, 2022, **87**, e202200006.  
241 13 W. Li, J. Li, T. D. Duong, S. A. Sapchenko, X. Han, J. D. Humby, G. F. S. Whitehead, I. J.  
242 Victórica-Yrezábal, I. da Silva, P. Manuel, M. D. Frogley, G. Cinque, M. Schröder and S. Yang,  
243 *J. Am. Chem. Soc.*, 2022, **144**, 13196–13204.  
244 14 Trace SO<sub>2</sub> Gas Capture in Stable 3D Viologen Ionic Porous Organic Framework Microsphere |  
245 ACS Applied Materials & Interfaces, <https://pubs.acs.org/doi/10.1021/acsami.3c05288>,  
246 (accessed August 4, 2023).  
247 15 X. Suo, Y. Yu, S. Qian, L. Zhou, X. Cui and H. Xing, *Angewandte Chemie International*  
248 *Edition*, 2021, **60**, 6986–6991.  
249 16 X. Cui, Q. Yang, L. Yang, R. Krishna, Z. Zhang, Z. Bao, H. Wu, Q. Ren, W. Zhou, B. Chen  
250 and H. Xing, *Advanced Materials*, 2017, **29**, 1606929.

251
